# Supplementary material for: Kinetic modelling of cobalt-catalyzed propene hydroformylation: a combined ab initio and experimental fitting protocol
Source: Royal Society of Chemistry journal article supplement (doi:10.1039/d3cy01625k), 2024-01-01
Supplement: d3cy01625k9.pdf [file d3cy01625k9.pdf]

# Supporting Information

## Kinetic Modelling of Cobalt-Catalyzed Propene Hydroformylation: A Combined *Ab Initio* and Experimental Fitting Protocol

Luxuan Guo,<sup>a</sup> Jeremy N. Harvey<sup>a,\*</sup>

<sup>a</sup> Department of Chemistry, KU Leuven, Celestijnenlaan 200F, B-3001 Leuven, Belgium

### Contents

1. Fitting results for models M0 – M6
2. Cartesian coordinates and total energies

### 1. Fitting results for models M0 – M6

**Table S1.** The 'raw' *ab initio* values for M0. The 'raw' *ab initio* enthalpies and entropies for all species are obtained by carrying out a linear fit of the *ab initio* Gibbs energies at three temperatures 383, 403 and 423 K (taken from [Szlapa and Harvey, *Chem. Eur. J.* **2018**, 24, 17096–17104]).

| Species | $\Delta H$ (kJ mol <sup>-1</sup> ) | $\Delta S$ (kJ mol <sup>-1</sup> K <sup>-1</sup> ) | $\Delta G$ (kJ mol <sup>-1</sup> )<br>383 K |
|---------|------------------------------------|----------------------------------------------------|---------------------------------------------|
| 1       | -17.991                            | 0.010878                                           | -22.157                                     |
| TS2     | -21.336                            | -0.168283                                          | 43.116                                      |
| 3       | 0.000                              | 0.000000                                           | 0.000                                       |
| TS4     | 150.632                            | 0.096896                                           | 113.521                                     |
| 5       | 144.657                            | 0.156086                                           | 84.876                                      |
| TS6     | 153.977                            | 0.134296                                           | 102.542                                     |
| 7       | 39.521                             | 0.014178                                           | 34.091                                      |
| TS8     | 66.643                             | 0.014703                                           | 61.012                                      |
| 9       | 40.294                             | 0.018707                                           | 33.129                                      |
| TS10    | 67.571                             | 0.013981                                           | 62.216                                      |
| 11      | 38.179                             | 0.018050                                           | 31.266                                      |
| TS12    | 84.362                             | -0.024861                                          | 93.884                                      |
| 13      | -45.361                            | -0.122480                                          | 1.549                                       |
| TS14    | 86.497                             | -0.030637                                          | 98.231                                      |
| 15      | -45.132                            | -0.130684                                          | 4.920                                       |
| TS16    | 9.958                              | -0.130028                                          | 59.759                                      |
| 17      | -4.354                             | -0.124777                                          | 43.436                                      |
| TS18    | 7.956                              | -0.135279                                          | 59.768                                      |
| 19      | -12.874                            | -0.127731                                          | 36.047                                      |
| TS20    | 0.021                              | -0.247322                                          | 94.745                                      |

|      |         |           |         |
|------|---------|-----------|---------|
| 21   | -89.117 | -0.270492 | 14.481  |
| TS22 | -4.739  | -0.257299 | 93.807  |
| 23   | -95.378 | -0.276990 | 10.709  |
| TS24 | 17.695  | -0.258021 | 116.517 |
| 25   | 31.270  | -0.119263 | 76.948  |
| TS26 | 10.970  | -0.263141 | 111.753 |
| 27   | 26.466  | -0.120707 | 72.697  |
| TS28 | 81.047  | -0.100622 | 119.585 |
| 29   | 18.304  | 0.023301  | 9.380   |
| TS30 | 83.211  | -0.109483 | 125.143 |
| TS31 | -14.803 | -0.269245 | 88.318  |
| TS32 | -14.040 | -0.274693 | 91.167  |

**Table S2.** The fitted  $\Delta H$  (in  $\text{kJ mol}^{-1}$ ),  $\Delta S$  (in  $\text{kJ mol}^{-1} \text{K}^{-1}$ ), and  $\Delta G$  (in  $\text{kJ mol}^{-1}$ ) values and change with respect to 'raw' *ab initio* values for M1.

| Species | $\Delta H$ (fitted and change) |           | $\Delta S$ (fitted and change) |           | $\Delta G$ (fitted and change) 383K |            |
|---------|--------------------------------|-----------|--------------------------------|-----------|-------------------------------------|------------|
| 1       | -14.389664                     | 3.601336  | 0.029768                       | 0.018890  | -25.790950                          | -3.633676  |
| TS2     | -24.225498                     | -2.889498 | -0.178672                      | -0.010389 | 44.205918                           | 1.089529   |
| TS4     | 144.644342                     | -5.987658 | 0.116890                       | 0.019994  | 99.875589                           | -13.645243 |
| TS6     | 148.230787                     | -5.746213 | 0.146050                       | 0.011754  | 92.293509                           | -10.248123 |
| TS12    | 87.934709                      | 3.572709  | -0.040464                      | -0.015603 | 103.432487                          | 9.548724   |
| TS14    | 85.855227                      | -0.641773 | -0.049135                      | -0.018498 | 104.674107                          | 6.443136   |
| TS31    | -16.997378                     | -2.194378 | -0.263049                      | 0.006196  | 83.750403                           | -4.567432  |
| TS32    | -15.530868                     | -1.490868 | -0.264915                      | 0.009778  | 85.931734                           | -5.235685  |

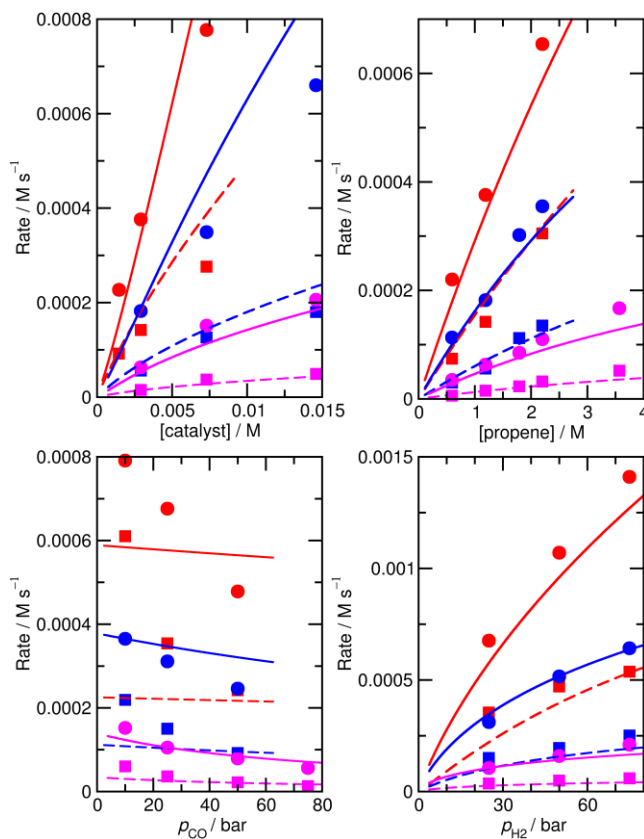

**Figure S1.** Predicted (lines) and experimental (points) rates for formation of n-butyraldehyde and iso-butyraldehyde under a range of different experimental conditions for M1. Experimental conditions: Top left:  $p_{\text{CO}}=p_{\text{H}_2}=50$  bar, [propene]=1.19 M; Top right:  $p_{\text{CO}}=p_{\text{H}_2}=50$  bar, [catalyst]=0.00292 M; Bottom left:  $p_{\text{H}_2}=25$  bar, [catalyst]=0.0073 M, [propene]=1.19 M; Bottom right:  $p_{\text{CO}}=25$  bar, [catalyst]=0.0073 M, [propene]=1.19 M. Red, 423 K; Blue, 403 K; Magenta, 383 K. Experimental rates for n-butyraldehyde are shown as circles, and for iso-butyraldehyde as squares. Calculated rates for n-butyraldehyde are shown as solid lines, and for iso-butyraldehyde as dashed lines.

**Table S3.** The derivative of RMS error with respect to  $\Delta H$  and  $T\Delta S$  for all species for 'raw' *ab initio* model M0 ( $T=403$  K).

| Species | $\frac{\partial \chi}{\partial \Delta H}$ | $\frac{\partial \chi}{\partial (T\Delta S)}$ |
|---------|-------------------------------------------|----------------------------------------------|
| 1       | -0.0101                                   | 0.0101                                       |
| TS2     | 0.0000                                    | 0.0000                                       |
| 3       | -0.0449                                   | 0.0444                                       |
| TS4     | 0.0128                                    | -0.0126                                      |
| 5       | 0.0000                                    | 0.0000                                       |
| TS6     | 0.0314                                    | -0.0308                                      |
| 7       | 0.0000                                    | 0.0000                                       |
| TS8     | 0.0000                                    | 0.0000                                       |
| 9       | 0.0000                                    | 0.0000                                       |
| TS10    | 0.0000                                    | 0.0000                                       |
| 11      | 0.0000                                    | 0.0000                                       |
| TS12    | -0.0005                                   | 0.0004                                       |
| 13      | -0.0010                                   | 0.0011                                       |
| TS14    | 0.0035                                    | -0.0034                                      |
| 15      | -0.0001                                   | 0.0001                                       |
| TS16    | 0.0000                                    | 0.0000                                       |
| 17      | 0.0000                                    | 0.0000                                       |
| TS18    | 0.0000                                    | 0.0000                                       |
| 19      | 0.0000                                    | 0.0000                                       |
| TS20    | 0.0000                                    | 0.0000                                       |
| 21      | -0.0003                                   | 0.0003                                       |
| TS22    | 0.0000                                    | 0.0000                                       |
| 23      | -0.0002                                   | 0.0002                                       |
| TS24    | 0.0110                                    | -0.0115                                      |
| 25      | 0.0000                                    | 0.0000                                       |
| TS26    | 0.0043                                    | -0.0037                                      |
| 27      | 0.0000                                    | 0.0000                                       |
| TS28    | -0.0002                                   | 0.0002                                       |
| 29      | 0.0000                                    | 0.0000                                       |
| TS30    | 0.0000                                    | 0.0000                                       |
| TS31    | -0.0055                                   | 0.0050                                       |
| TS32    | 0.0000                                    | 0.0001                                       |

**Table S4.** The fitted  $\Delta H$  (in  $\text{kJ mol}^{-1}$ ),  $\Delta S$  (in  $\text{kJ mol}^{-1} \text{K}^{-1}$ ), and  $\Delta G$  (in  $\text{kJ mol}^{-1}$ ) values and change with respect to 'raw' *ab initio* values for M2.

| Species | $\Delta H$ (fitted and change) |           | $\Delta S$ (fitted and change) |           | $\Delta G$ (fitted and change) 383K |            |
|---------|--------------------------------|-----------|--------------------------------|-----------|-------------------------------------|------------|
| 1       | -16.014568                     | 1.976432  | 0.017351                       | 0.006473  | -22.659872                          | -0.502598  |
| TS4     | 144.691500                     | -5.940500 | 0.109756                       | 0.012860  | 102.655095                          | -10.865737 |
| TS6     | 149.521605                     | -4.455395 | 0.145778                       | 0.011482  | 93.688691                           | -8.852941  |
| TS12    | 88.688418                      | 4.326418  | -0.037836                      | -0.012975 | 103.179540                          | 9.295777   |
| 13      | -39.838624                     | 5.522376  | -0.135150                      | -0.012670 | 11.923750                           | 10.374910  |
| TS14    | 86.486169                      | -0.010831 | -0.047713                      | -0.017076 | 104.760289                          | 6.529318   |
| 15      | -49.124168                     | -3.992168 | -0.147646                      | -0.016962 | 7.424222                            | 2.504250   |
| TS24    | 12.007198                      | -5.687802 | -0.266910                      | -0.008889 | 114.233824                          | -2.283219  |
| TS26    | 15.322114                      | 4.352114  | -0.256758                      | 0.006383  | 113.660240                          | 1.907237   |
| TS31    | -14.966906                     | -0.163906 | -0.279899                      | -0.010654 | 92.234229                           | 3.916394   |
| TS32    | -15.020022                     | -0.980022 | -0.270948                      | 0.003745  | 88.752971                           | -2.414448  |

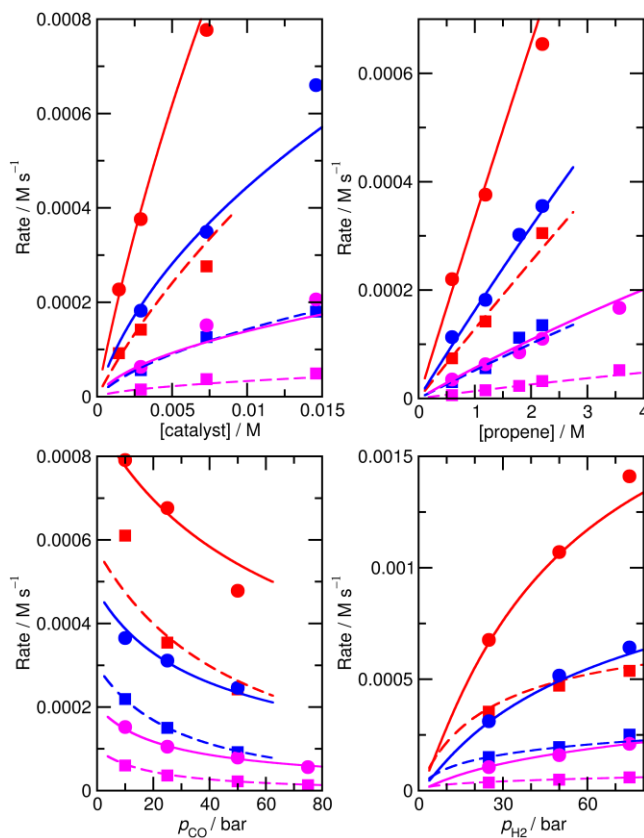

**Figure S2.** Predicted (lines) and experimental (points) rates for formation of n-butyraldehyde and isobutyraldehyde under a range of different experimental conditions for M3. See Fig. S1 for full reaction conditions.

**Table S5.** The fitted  $\Delta H$  (in  $\text{kJ mol}^{-1}$ ),  $\Delta S$  (in  $\text{kJ mol}^{-1} \text{K}^{-1}$ ), and  $\Delta G$  (in  $\text{kJ mol}^{-1}$ ) values and change with respect to 'raw' ab initio values for M3.

| Species | $\Delta H$ (fitted and change) |             | $\Delta S$ (fitted and change) |           | $\Delta G$ (fitted and change) 383K |            |
|---------|--------------------------------|-------------|--------------------------------|-----------|-------------------------------------|------------|
| 1       | -103.717457                    | -85.726457  | -0.187143                      | -0.198021 | -32.041688                          | -9.884414  |
| TS2     | -67.643823                     | -46.307823  | -0.316470                      | -0.148187 | 53.564187                           | 10.447798  |
| 3       | 0.000000                       | 0.000000    | 0.000000                       | 0.000000  | 0.000000                            | 0.000000   |
| TS4     | 21.107150                      | -129.524850 | -0.031809                      | -0.128705 | 33.289997                           | -80.230835 |
| 5       | 73.701667                      | -70.955333  | 0.019139                       | -0.136947 | 66.371430                           | -18.504632 |
| TS6     | 42.634569                      | -111.342431 | -0.127224                      | -0.261520 | 91.361361                           | -11.180271 |
| 7       | -20.942124                     | -60.463124  | -0.137915                      | -0.152093 | 31.879321                           | -2.211505  |
| TS8     | 16.256047                      | -50.386953  | -0.117291                      | -0.131994 | 61.178500                           | 0.166749   |
| 9       | -46.553247                     | -86.847247  | -0.144202                      | -0.162909 | 8.676119                            | -24.453100 |
| TS10    | 38.660157                      | -28.910843  | -0.138899                      | -0.152880 | 91.858474                           | 29.642197  |
| 11      | -30.095600                     | -68.274600  | -0.152778                      | -0.170828 | 28.418374                           | -2.847476  |
| TS12    | 21.677860                      | -62.684140  | -0.203173                      | -0.178312 | 99.493119                           | 5.609356   |
| 13      | -88.696355                     | -43.335355  | -0.320201                      | -0.197721 | 33.940628                           | 32.391788  |
| TS14    | 32.683266                      | -53.813734  | -0.174592                      | -0.143955 | 99.552002                           | 1.321031   |
| 15      | -102.658070                    | -57.526070  | -0.279403                      | -0.148719 | 4.353279                            | -0.566693  |
| TS16    | -53.465496                     | -63.423496  | -0.275658                      | -0.145630 | 52.111518                           | -7.647206  |
| 17      | -75.847933                     | -71.493933  | -0.271067                      | -0.146290 | 27.970728                           | -15.464863 |
| TS18    | -49.702281                     | -57.658281  | -0.291084                      | -0.155805 | 61.782891                           | 2.015034   |
| 19      | -76.197572                     | -63.323572  | -0.285335                      | -0.157604 | 33.085733                           | -2.961240  |
| TS20    | -80.913112                     | -80.934112  | -0.401196                      | -0.153874 | 72.744956                           | -22.000370 |
| 21      | -132.709007                    | -43.592007  | -0.433525                      | -0.163033 | 33.331068                           | 18.849632  |
| TS22    | -86.792662                     | -82.053662  | -0.404624                      | -0.147325 | 68.178330                           | -25.628187 |
| 23      | -169.751462                    | -74.373462  | -0.434083                      | -0.157093 | -3.497673                           | -14.206843 |
| TS24    | -10.913633                     | -28.608633  | -0.310738                      | -0.052717 | 108.099021                          | -8.418022  |
| 25      | -29.880405                     | -61.150405  | -0.268748                      | -0.149485 | 73.050079                           | -3.897650  |
| TS26    | -52.618547                     | -63.588547  | -0.403353                      | -0.140212 | 101.865652                          | -9.887351  |
| 27      | -34.684405                     | -61.150405  | -0.270192                      | -0.149485 | 68.799131                           | -3.897650  |
| TS28    | 52.117085                      | -28.929915  | -0.261735                      | -0.161113 | 152.361590                          | 32.776364  |
| 29      | -42.846405                     | -61.150405  | -0.126184                      | -0.149485 | 5.482067                            | -3.897650  |
| TS30    | 25.666324                      | -57.544676  | -0.239066                      | -0.129583 | 117.228602                          | -7.914387  |
| TS31    | -15.870633                     | -1.067633   | -0.419118                      | -0.149873 | 144.651561                          | 56.333726  |
| TS32    | -85.545022                     | -71.505022  | -0.423836                      | -0.149143 | 76.784166                           | -14.383253 |

For M4, it is worth noting that we performed multiple partially unconstrained gradient-based minimizations with different optimization parameters to ensure it indeed reach the global minimum. Among these fittings having the same RMS error of 13.4%, the fitted values for **TS4** are always different but that for other species are always constant, suggesting **TS4** does not have an effect on the final RMS error.

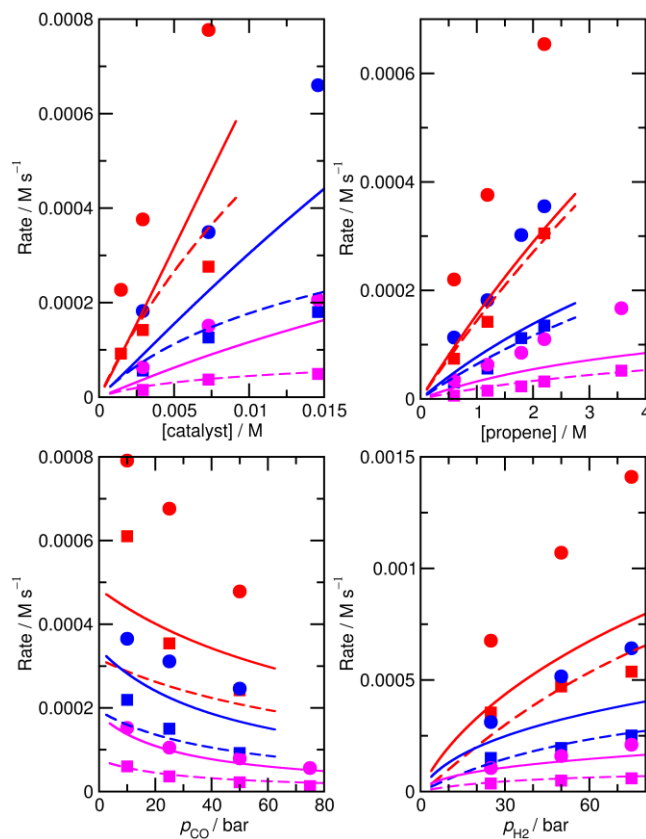

**Figure S3.** Predicted (lines) and experimental (points) rates for formation of n-butyraldehyde and isobutyraldehyde under a range of different experimental conditions for MN. See Fig. S1 for full reaction conditions.

**Table S6.** The derivative of RMS error with respect to  $\Delta H$  and  $T\Delta S$  for all species for 'new' *ab initio* model MN ( $T=403$  K).

| Species | $\frac{\partial \chi}{\partial \Delta H}$ | $\frac{\partial \chi}{\partial (T\Delta S)}$ |
|---------|-------------------------------------------|----------------------------------------------|
| 1       | -0.0086                                   | 0.0090                                       |
| TS2     | 0.0000                                    | 0.0000                                       |
| 3       | 0.0025                                    | -0.0001                                      |
| TS4'    | 0.0013                                    | -0.0014                                      |
| 5'      | 0.0000                                    | 0.0000                                       |
| TS6'    | -0.0124                                   | 0.0108                                       |
| 7       | 0.0000                                    | 0.0000                                       |
| TS8     | 0.0000                                    | 0.0000                                       |
| 9       | 0.0000                                    | 0.0000                                       |
| TS10    | 0.0000                                    | 0.0000                                       |
| 11      | 0.0000                                    | 0.0000                                       |
| TS12    | 0.0041                                    | -0.0039                                      |
| 13      | -0.0026                                   | 0.0027                                       |
| TS14    | -0.0261                                   | 0.0251                                       |

|      |         |         |
|------|---------|---------|
| 15   | -0.0003 | 0.0003  |
| TS16 | 0.0000  | 0.0000  |
| 17   | 0.0000  | 0.0000  |
| TS18 | 0.0000  | 0.0000  |
| 19   | 0.0000  | 0.0000  |
| TS20 | 0.0000  | 0.0000  |
| 21   | -0.0005 | 0.0006  |
| TS22 | 0.0000  | 0.0000  |
| 23   | -0.0004 | 0.0004  |
| TS24 | 0.0553  | -0.0550 |
| 25   | 0.0000  | 0.0000  |
| TS26 | -0.0477 | 0.0465  |
| 27   | 0.0000  | 0.0000  |
| TS28 | -0.0002 | 0.0002  |
| 29   | 0.0000  | 0.0000  |
| TS30 | 0.0000  | 0.0000  |
| TS31 | 0.0399  | -0.0391 |
| TS32 | -0.0041 | 0.0039  |

**Table S7.** The fitted  $\Delta H$  (in  $\text{kJ mol}^{-1}$ ),  $\Delta S$  (in  $\text{kJ mol}^{-1} \text{K}^{-1}$ ), and  $\Delta G$  (in  $\text{kJ mol}^{-1}$ ) values and change with respect to 'new' *ab initio* values for M5.

| Species | $\Delta H$ (fitted and change) |           | $\Delta S$ (fitted and change) |           | $\Delta G$ (fitted and change) 383K |            |
|---------|--------------------------------|-----------|--------------------------------|-----------|-------------------------------------|------------|
| 1       | -22.192219                     | -4.201219 | 0.010664                       | -0.000214 | -26.276447                          | -4.119173  |
| TS4'    | 68.394891                      | -6.105109 | -0.064470                      | 0.015530  | 93.086902                           | -12.053098 |
| TS6'    | 60.124311                      | -9.175689 | -0.088148                      | -0.020148 | 93.885165                           | -1.458835  |
| TS12    | 89.401823                      | 5.039823  | -0.029146                      | -0.004285 | 100.564635                          | 6.680872   |
| 13      | -42.225191                     | 3.135809  | -0.125091                      | -0.002611 | 5.684745                            | 4.135905   |
| TS14    | 84.938495                      | -1.558505 | -0.045165                      | -0.014528 | 102.236579                          | 4.005608   |
| 15      | -49.668348                     | -4.536348 | -0.119154                      | 0.011530  | -4.032376                           | -8.952348  |
| TS24    | 18.043603                      | 0.348603  | -0.242710                      | 0.015311  | 111.001553                          | -5.515490  |
| TS26    | 12.292856                      | 1.322856  | -0.250426                      | 0.012715  | 108.206128                          | -3.546875  |
| TS31    | -14.194753                     | 0.608247  | -0.278362                      | -0.009117 | 92.418007                           | 4.100172   |
| TS32    | -11.913796                     | 2.126204  | -0.265711                      | 0.008982  | 89.853471                           | -1.313948  |

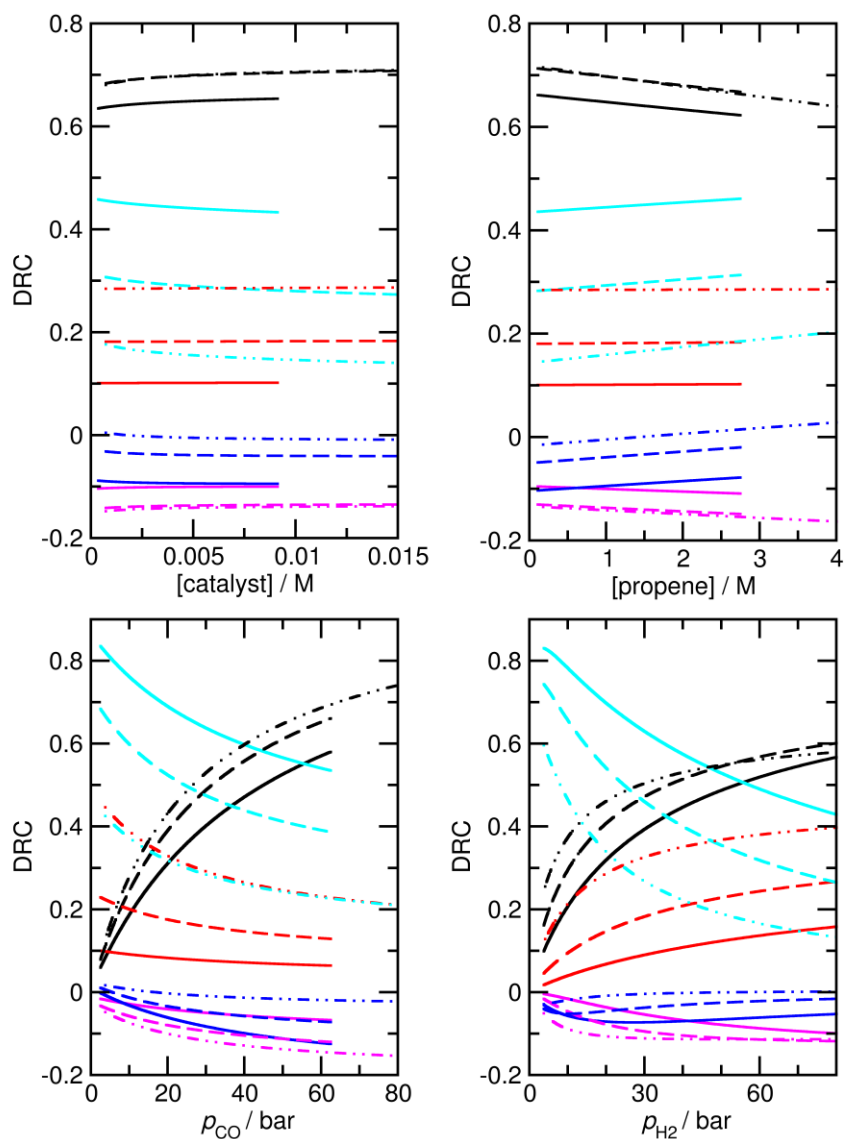

**Figure S4.** Calculated degree of rate control (DRC) values for formation of n-butylaldehyde for M5 under a range of different experimental conditions. Experimental conditions: Top left:  $p_{CO}=p_{H2}=50$  bar, [propene]=1.19 M; Top right:  $p_{CO}=p_{H2}=50$  bar, [catalyst]=0.00292 M; Bottom left:  $p_{H2}=25$  bar, [catalyst]=0.0073 M, [propene]=1.19 M; Bottom right:  $p_{CO}=25$  bar, [catalyst]=0.0073 M, [propene]=1.19 M. Black, step 3; Red, step 6; Magenta, step 7; Cyan, step 12; Blue, step 13; Solid lines, 423 K; Dashed lines, 403 K; Dash double-dotted lines, 383 K.



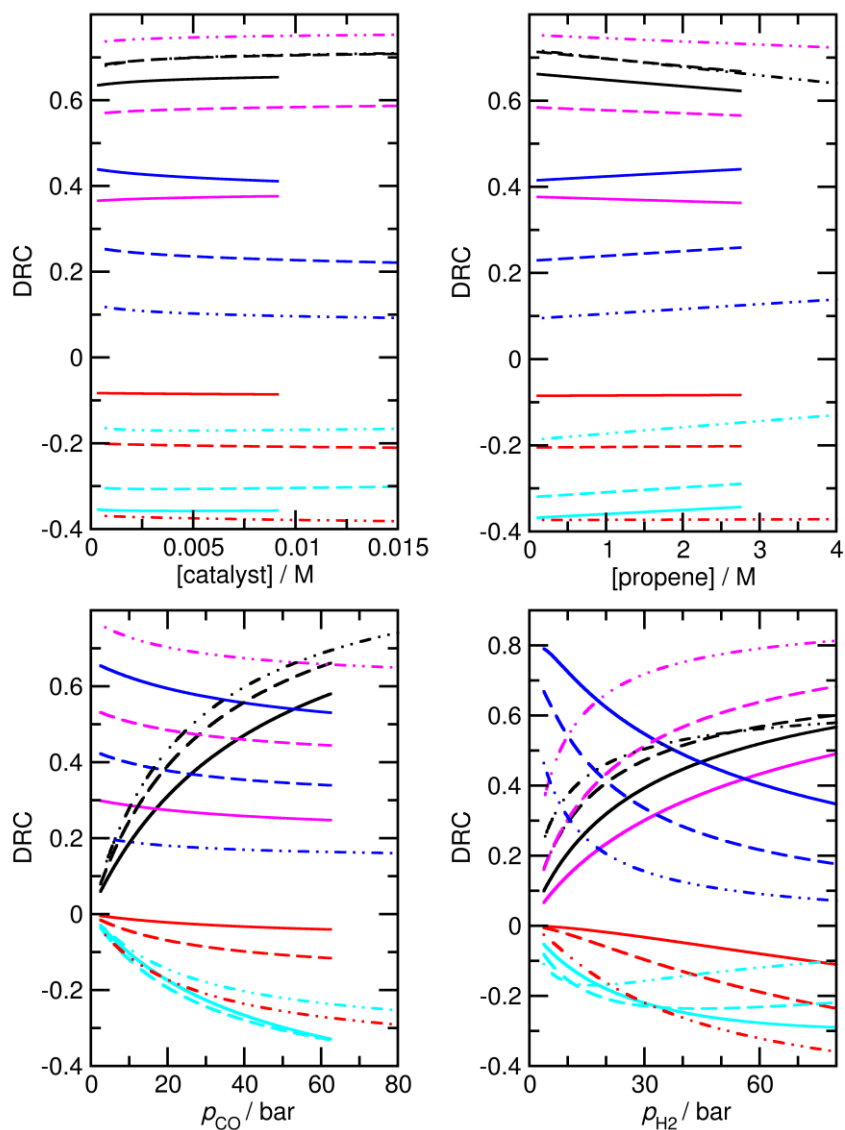

**Figure S5.** Calculated degree of rate control (DRC) values for formation of iso-butylaldehyde for M5 under a range of different experimental conditions. Experimental conditions: Top left:  $p_{CO}=p_{H_2}=50$  bar, [propene]=1.19 M; Top right:  $p_{CO}=p_{H_2}=50$  bar, [catalyst]=0.00292 M; Bottom left:  $p_{H_2}=25$  bar, [catalyst]=0.0073 M, [propene]=1.19 M; Bottom right:  $p_{CO}=25$  bar, [catalyst]=0.0073 M, [propene]=1.19 M. Black, step 3; Red, step 6; Magenta, step 7; Cyan, step 12; Blue, step 13; Solid lines, 423 K; Dashed lines, 403 K; Dash double-dotted lines, 383 K.

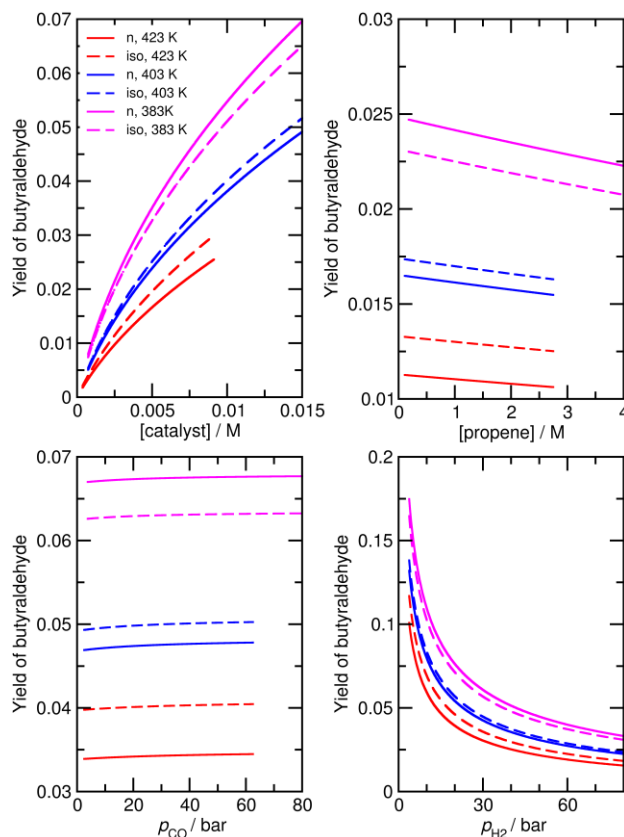

**Figure S6.** Predicted yield of n- and iso-butylaldehyde through alternative bimetallic mechanism under a range of different experimental conditions for M5. Experimental conditions: Top left:  $p_{\text{CO}}=p_{\text{H}_2}=50$  bar, [propene]=1.19 M; Top right:  $p_{\text{CO}}=p_{\text{H}_2}=50$  bar, [catalyst]=0.00292 M; Bottom left:  $p_{\text{H}_2}=25$  bar, [catalyst]=0.0073 M, [propene]=1.19 M; Bottom right:  $p_{\text{CO}}=25$  bar, [catalyst]=0.0073 M, [propene]=1.19 M. Red, 423 K; Blue, 403 K; Magenta, 383 K; Solid lines, n-butylaldehyde; Dashed lines, iso-butylaldehyde.

**Table S8.** The fitted  $\Delta H$  (in  $\text{kJ mol}^{-1}$ ),  $\Delta S$  (in  $\text{kJ mol}^{-1} \text{K}^{-1}$ ), and  $\Delta G$  (in  $\text{kJ mol}^{-1}$ ) values and change with respect to 'new' *ab initio* values for M6.

| Species | $\Delta H$ (fitted and change) |           | $\Delta S$ (fitted and change) |           | $\Delta G$ (fitted and change) 383K |           |
|---------|--------------------------------|-----------|--------------------------------|-----------|-------------------------------------|-----------|
| 1       | -15.990040                     | 2.000960  | 0.027545                       | 0.016667  | -26.539650                          | -4.382376 |
| TS4'    | 69.620580                      | -4.879420 | -0.090418                      | -0.010418 | 104.250539                          | -0.889461 |
| TS6'    | 63.409041                      | -5.890959 | -0.079511                      | -0.011511 | 93.861691                           | -1.482309 |
| TS12    | 85.825950                      | 1.463950  | -0.038588                      | -0.013727 | 100.605187                          | 6.721424  |
| 13      | -47.123422                     | -1.762422 | -0.133762                      | -0.011282 | 4.107308                            | 2.558468  |
| TS14    | 84.027440                      | -2.469560 | -0.047411                      | -0.016774 | 102.185887                          | 3.954916  |
| 15      | -47.315941                     | -2.183941 | -0.146031                      | -0.015347 | 8.613953                            | 3.693981  |
| TS24    | 15.968126                      | -1.726874 | -0.246735                      | 0.011286  | 110.467488                          | -6.049555 |
| TS26    | 14.379286                      | 3.409286  | -0.244643                      | 0.018498  | 108.077375                          | -3.675628 |

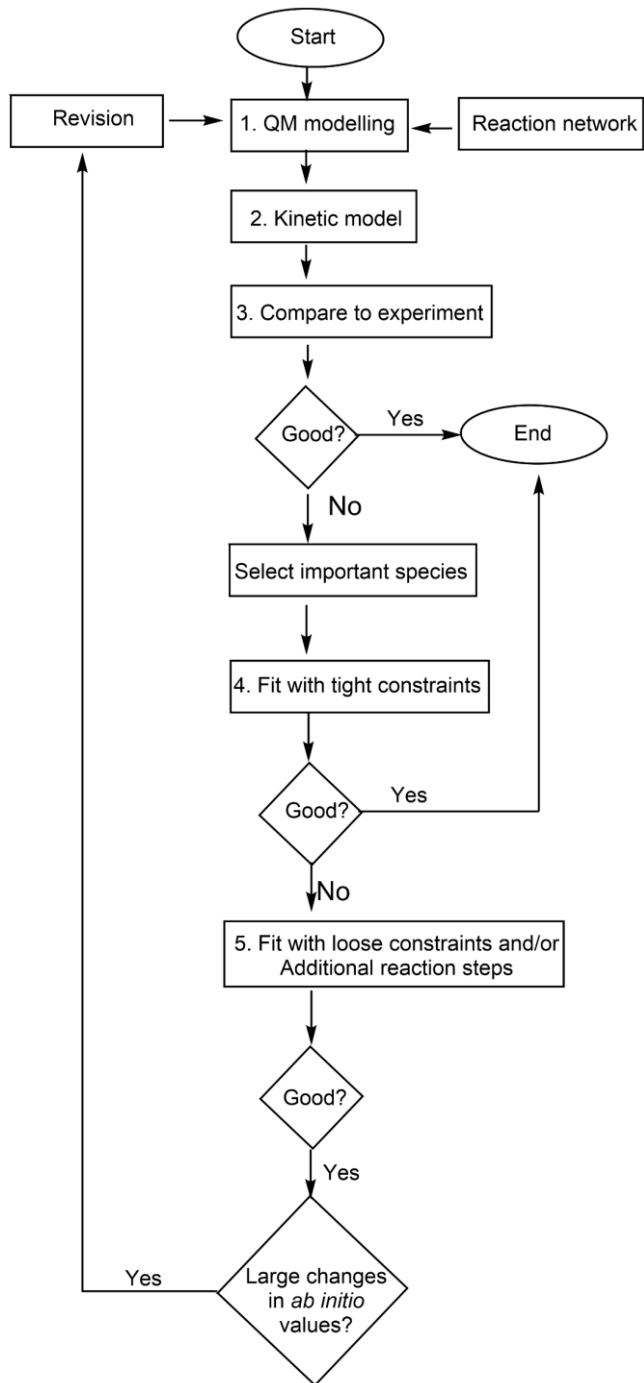

**Scheme S1.** Flowchart of our protocol.

## 2. Cartesian coordinates and total energies

In the table below, E and G(383 K) values are electronic energies and Gibbs energies calculated at 383 K, respectively (B3LYP-D3BJ/6-311G(d)). Note that **TS4'** and **HCo(CO)<sub>3</sub>(propene)** were already reported in [Szlapa and Harvey, *Chem. Eur. J.* **2018**, 24, 17096–17104].

### CO

E: -113.346962

G(383 K): -113.367529

|   |           |           |           |
|---|-----------|-----------|-----------|
| C | 0.000000  | 0.000000  | -0.643975 |
| O | -0.000000 | -0.000000 | 0.482982  |

### HCo(CO)<sub>3</sub>\_C2V

E: -1723.459194

G(383 K): -1723.468982

|    |           |           |           |
|----|-----------|-----------|-----------|
| Co | 0.000000  | 0.000000  | 0.271922  |
| H  | 0.000000  | 0.000000  | 1.785676  |
| C  | 0.000000  | 1.746603  | 0.588571  |
| O  | 0.000000  | 2.849993  | 0.867945  |
| C  | -0.000000 | -1.746603 | 0.588571  |
| O  | -0.000000 | -2.849993 | 0.867945  |
| C  | -0.000000 | -0.000000 | -1.496444 |
| O  | -0.000000 | -0.000000 | -2.637358 |

### HCo(CO)<sub>4</sub>\_C3V

E: -1836.858366

G(383 K): -1836.862874

|    |           |           |           |
|----|-----------|-----------|-----------|
| Co | 0.000000  | 0.000000  | 0.184766  |
| H  | 0.000000  | 0.000000  | 1.665397  |
| C  | 0.000000  | 1.767501  | 0.456143  |
| O  | 0.000000  | 2.879923  | 0.700971  |
| C  | 1.530701  | -0.883750 | 0.456143  |
| O  | 2.494086  | -1.439961 | 0.700971  |
| C  | 0.000000  | 0.000000  | -1.613721 |
| O  | 0.000000  | 0.000000  | -2.750703 |
| C  | -1.530701 | -0.883750 | 0.456143  |
| O  | -2.494086 | -1.439961 | 0.700971  |

### Propene\_CS

E: -117.942737

G(383 K): -117.892845

|   |           |           |           |
|---|-----------|-----------|-----------|
| C | 0.000000  | 0.473432  | 0.000000  |
| C | -1.289483 | 0.152100  | 0.000000  |
| H | -1.619534 | -0.883491 | 0.000000  |
| H | -2.066804 | 0.908955  | 0.000000  |
| H | 0.278444  | 1.526848  | 0.000000  |
| C | 1.135555  | -0.505375 | 0.000000  |
| H | 1.776649  | -0.367687 | 0.877784  |
| H | 0.778162  | -1.537879 | 0.000000  |
| H | 1.776649  | -0.367687 | -0.877784 |

### HCo(CO)<sub>3</sub>(propene)

E: -1841.443345

G(383 K): -1841.377127

|    |           |           |           |
|----|-----------|-----------|-----------|
| Co | 0.198712  | 0.032272  | -0.138144 |
| H  | -0.316182 | -0.062166 | -1.522291 |

|   |           |           |           |
|---|-----------|-----------|-----------|
| C | -0.485836 | 1.662491  | -0.310827 |
| O | -0.978654 | 2.676158  | -0.490706 |
| C | 1.721165  | -0.302062 | -1.000380 |
| O | 2.653223  | -0.521705 | -1.620458 |
| C | 0.851312  | 0.158519  | 1.538490  |
| O | 1.262523  | 0.239577  | 2.597100  |
| C | -1.565280 | -0.983149 | 0.430453  |
| H | -1.715956 | -0.790932 | 1.489660  |
| C | -0.570800 | -1.896036 | 0.082835  |
| H | -0.017614 | -2.420198 | 0.853123  |
| H | -0.613182 | -2.400959 | -0.875460 |
| C | -2.770711 | -0.708477 | -0.431665 |
| H | -3.598904 | -1.360004 | -0.128973 |
| H | -3.118335 | 0.322945  | -0.341350 |
| H | -2.560889 | -0.899984 | -1.485733 |

### HCo(CO)<sub>3</sub>(toluene)

E: -1995.133927

G(383 K): -1995.02949

|    |           |           |           |
|----|-----------|-----------|-----------|
| Co | -1.039300 | 0.204151  | -0.134290 |
| H  | -1.618308 | 0.572657  | -1.462846 |
| C  | -2.362970 | -0.955932 | -0.235169 |
| O  | -3.298407 | -1.608966 | -0.318429 |
| C  | -1.102276 | 1.954457  | 0.042590  |
| O  | -1.250837 | 3.085831  | 0.132436  |
| C  | -0.421944 | -0.218386 | 1.492141  |
| O  | -0.036468 | -0.485345 | 2.529706  |
| C  | 2.177150  | -1.836267 | 0.352361  |
| H  | 2.620175  | -2.597565 | 0.985171  |
| C  | 2.640520  | -0.512131 | 0.435102  |
| C  | 1.165101  | -2.169749 | -0.525512 |
| C  | 0.596247  | -1.174214 | -1.345749 |
| H  | 0.809399  | -3.191435 | -0.596358 |
| H  | -0.083326 | -1.454196 | -2.140312 |
| C  | 2.106814  | 0.485439  | -0.363554 |
| C  | 1.069257  | 0.145400  | -1.268420 |
| H  | 0.776784  | 0.863056  | -2.024973 |
| H  | 3.432003  | -0.267941 | 1.136375  |
| C  | 2.583104  | 1.909180  | -0.286095 |
| H  | 2.888093  | 2.281501  | -1.268530 |
| H  | 1.784598  | 2.568861  | 0.069482  |
| H  | 3.431381  | 2.014032  | 0.391956  |

### Toluene

E: -271.647314

G(383 K, 1M): -271.557062

|   |           |           |           |
|---|-----------|-----------|-----------|
| C | -0.004751 | 0.911576  | 0.000000  |
| C | -0.007295 | 0.194184  | 1.199681  |
| C | -0.007295 | -1.198157 | 1.202713  |
| C | -0.006665 | -1.900406 | -0.000000 |

|   |           |           |           |
|---|-----------|-----------|-----------|
| C | -0.007295 | -1.198157 | -1.202713 |
| C | -0.007295 | 0.194184  | -1.199681 |
| H | -0.010979 | 0.733061  | 2.142889  |
| H | -0.011862 | -1.735094 | 2.145893  |
| H | -0.009806 | -2.985346 | -0.000000 |
| H | -0.011862 | -1.735094 | -2.145893 |
| H | -0.010979 | 0.733061  | -2.142889 |
| C | 0.028401  | 2.419236  | 0.000000  |
| H | -0.465021 | 2.831716  | 0.883090  |
| H | 1.058715  | 2.791220  | 0.000000  |
| H | -0.465021 | 2.831716  | -0.883090 |

**TS6'**

E: -2113.077729  
G(383 K): -2112.906424  
Co -0.618191 -0.204079 0.090826  
H -1.107115 0.314299 1.430881  
C -0.877330 1.500149 -0.299463  
O -1.119225 2.598984 -0.494810  
C -0.813409 -1.735076 0.967341  
O -1.006334 -2.678141 1.580427  
C 0.072944 -0.776545 -1.436856  
O 0.543511 -1.132646 -2.413990  
C 2.357735 1.191607 0.544660  
C 3.061882 0.960584 -0.641118  
H 3.296058 1.797626 -1.292354  
C 2.051066 0.094514 1.357491  
C 2.465765 -1.192021 1.009483  
H 2.223703 -2.026916 1.658799  
C 3.464241 -0.322572 -0.997631  
C 3.172344 -1.404698 -0.169018  
H 3.483487 -2.405624 -0.447513  
C -3.790732 -0.238046 0.090816  
C -3.379841 -0.683815 -1.095831  
H -3.124860 -1.724993 -1.255975  
H -3.843435 -0.939990 0.920897  
H -3.307451 -0.027346 -1.957926  
C -4.188557 1.172036 0.394886

|   |           |           |           |
|---|-----------|-----------|-----------|
| H | -3.572732 | 1.587272  | 1.199221  |
| H | -4.087300 | 1.819547  | -0.478542 |
| H | -5.227750 | 1.220021  | 0.737072  |
| H | 4.001355  | -0.480346 | -1.926797 |
| H | 1.517284  | 0.254248  | 2.287673  |
| C | 1.977901  | 2.589772  | 0.957381  |
| H | 2.827577  | 3.102746  | 1.419498  |
| H | 1.661422  | 3.192212  | 0.103070  |
| H | 1.163251  | 2.586469  | 1.683828  |

**TS4'**

E: -2108.477881  
G(383 K): -2108.377292  
Co -0.954803 -0.100352 -0.197763  
H -1.347169 0.337881 -1.592881  
C -1.205343 -1.690794 -0.972728  
O -1.377891 -2.663872 -1.538275  
C -0.952387 1.657262 -0.000940  
O -0.976548 2.795866 0.057037  
C -0.455392 -0.595989 1.435350  
O -0.116987 -0.902527 2.479726  
C -3.571189 -0.136642 0.427333  
O -4.117552 0.854617 0.455678  
C 2.578683 -1.639350 0.461567  
C 1.982249 -1.431832 -0.777104  
C 2.976990 -0.541507 1.222287  
C 1.784149 -0.134102 -1.254472  
H 1.664107 -2.277624 -1.377039  
C 2.795227 0.749697 0.736963  
H 3.428184 -0.692259 2.197113  
C 2.209708 0.974445 -0.512899  
H 1.344958 0.017519 -2.234282  
H 3.116571 1.598257 1.333669  
C 2.086741 2.369531 -1.067203  
H 3.043271 2.706757 -1.479180  
H 1.349098 2.420974 -1.869918  
H 1.793924 3.087254 -0.298011  
H 2.721949 -2.646240 0.837876
