# Supplementary figures and images for: Kinetic modelling of cobalt-catalyzed propene hydroformylation: a combined ab initio and experimental fitting protocol
Source: Royal Society of Chemistry journal article supplement (doi:10.1039/d3cy01625k), 2024-01-01

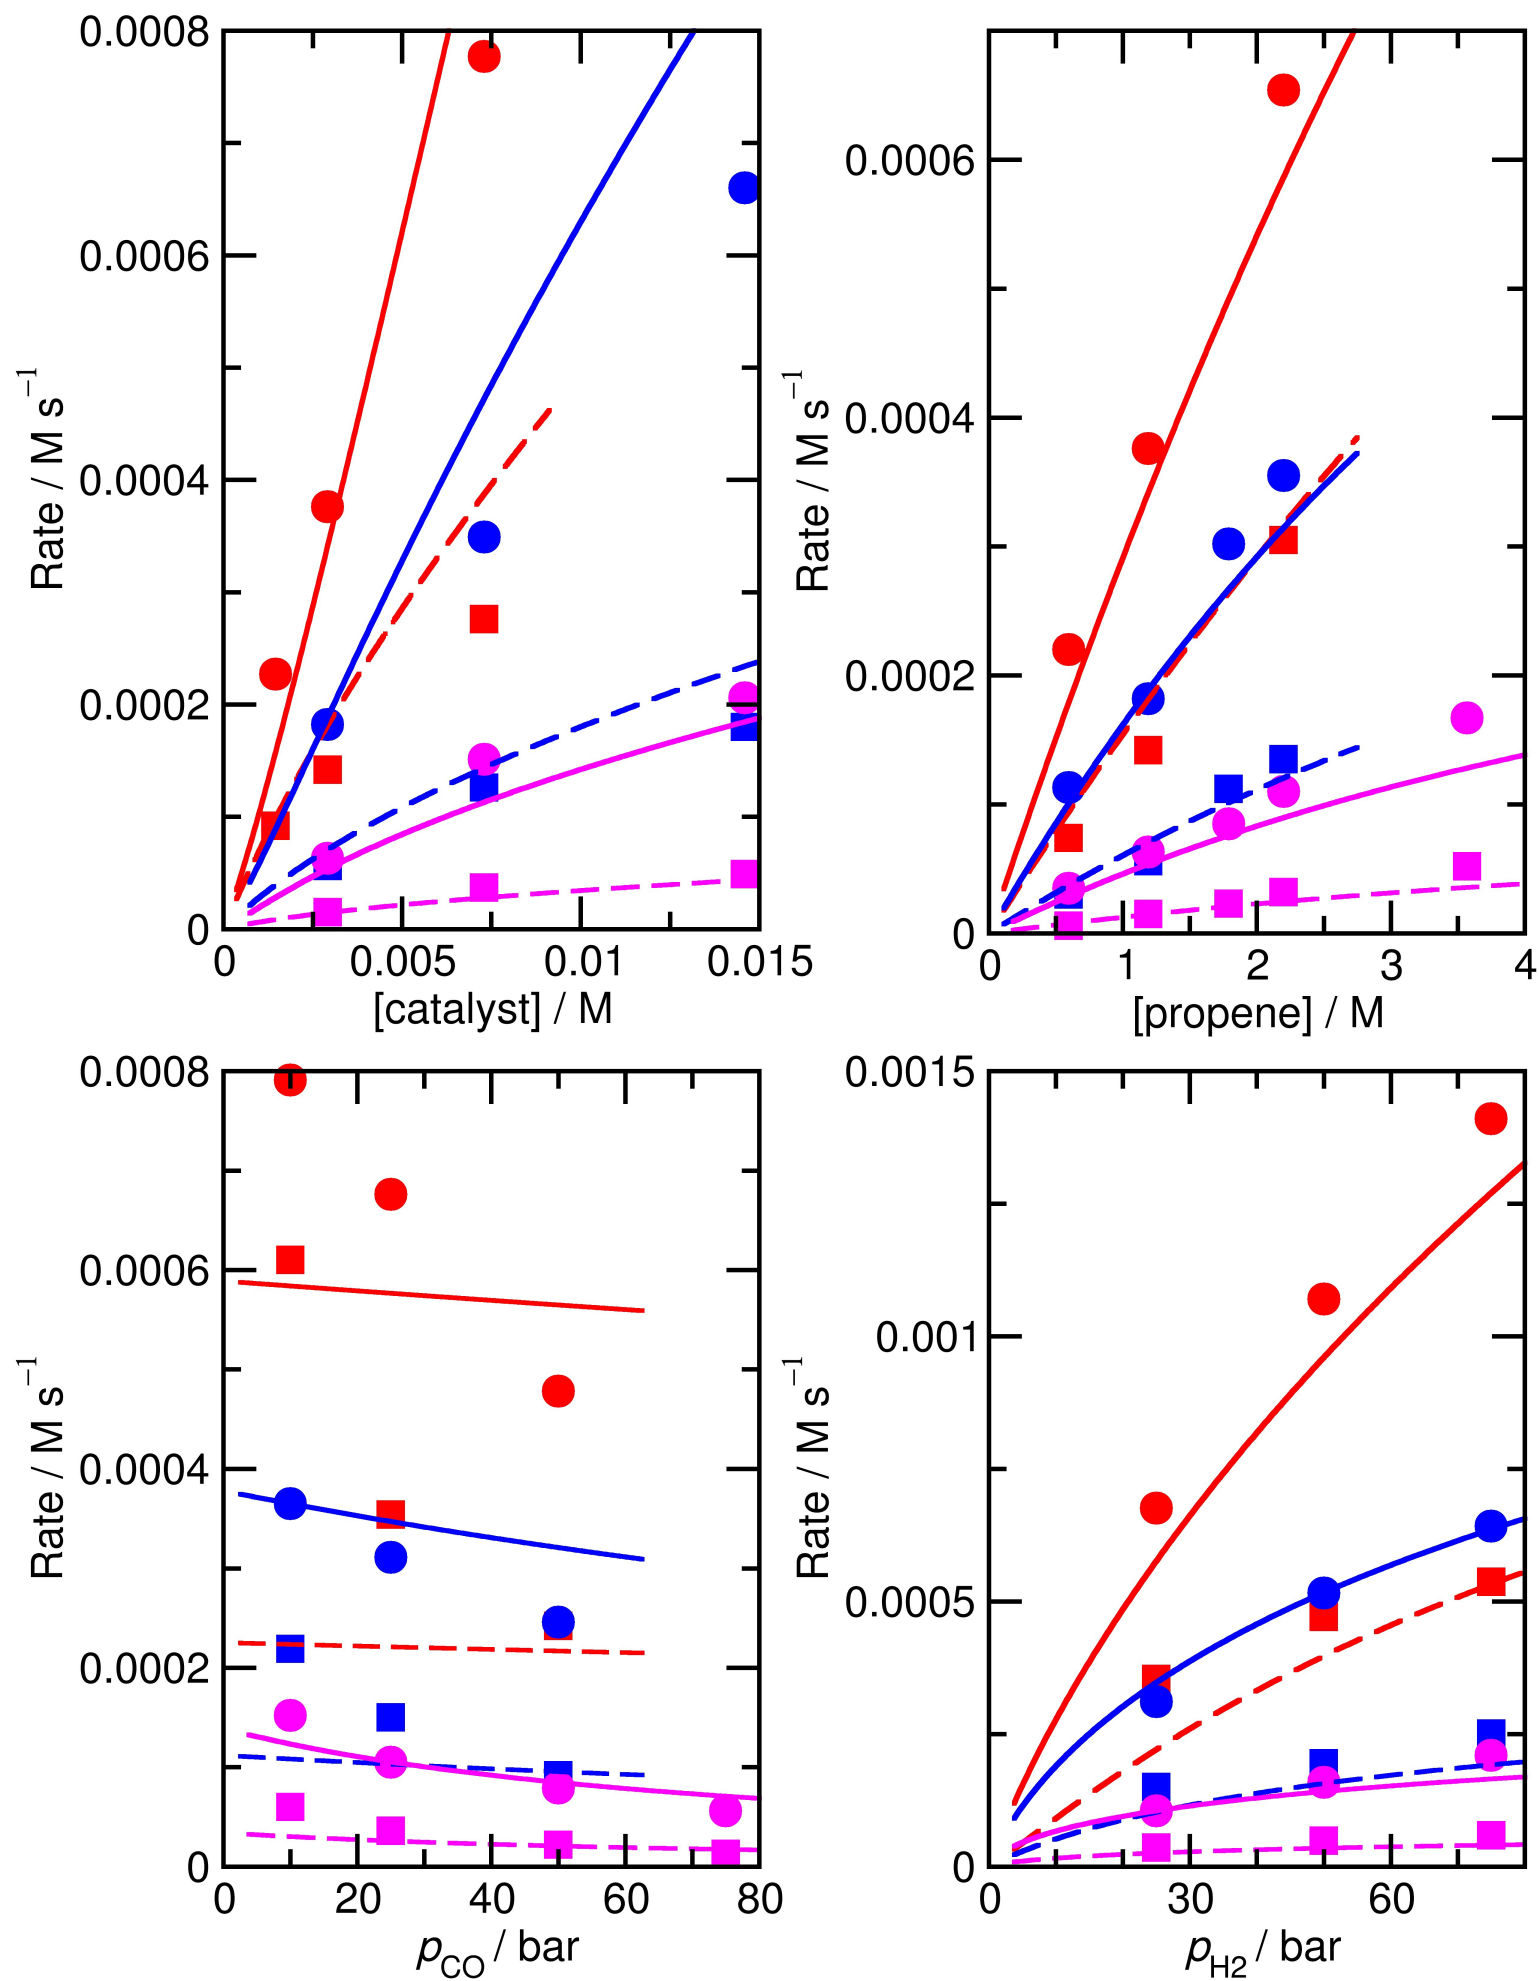

Supplement: d3cy01625k2.pdf [file d3cy01625k2.pdf]

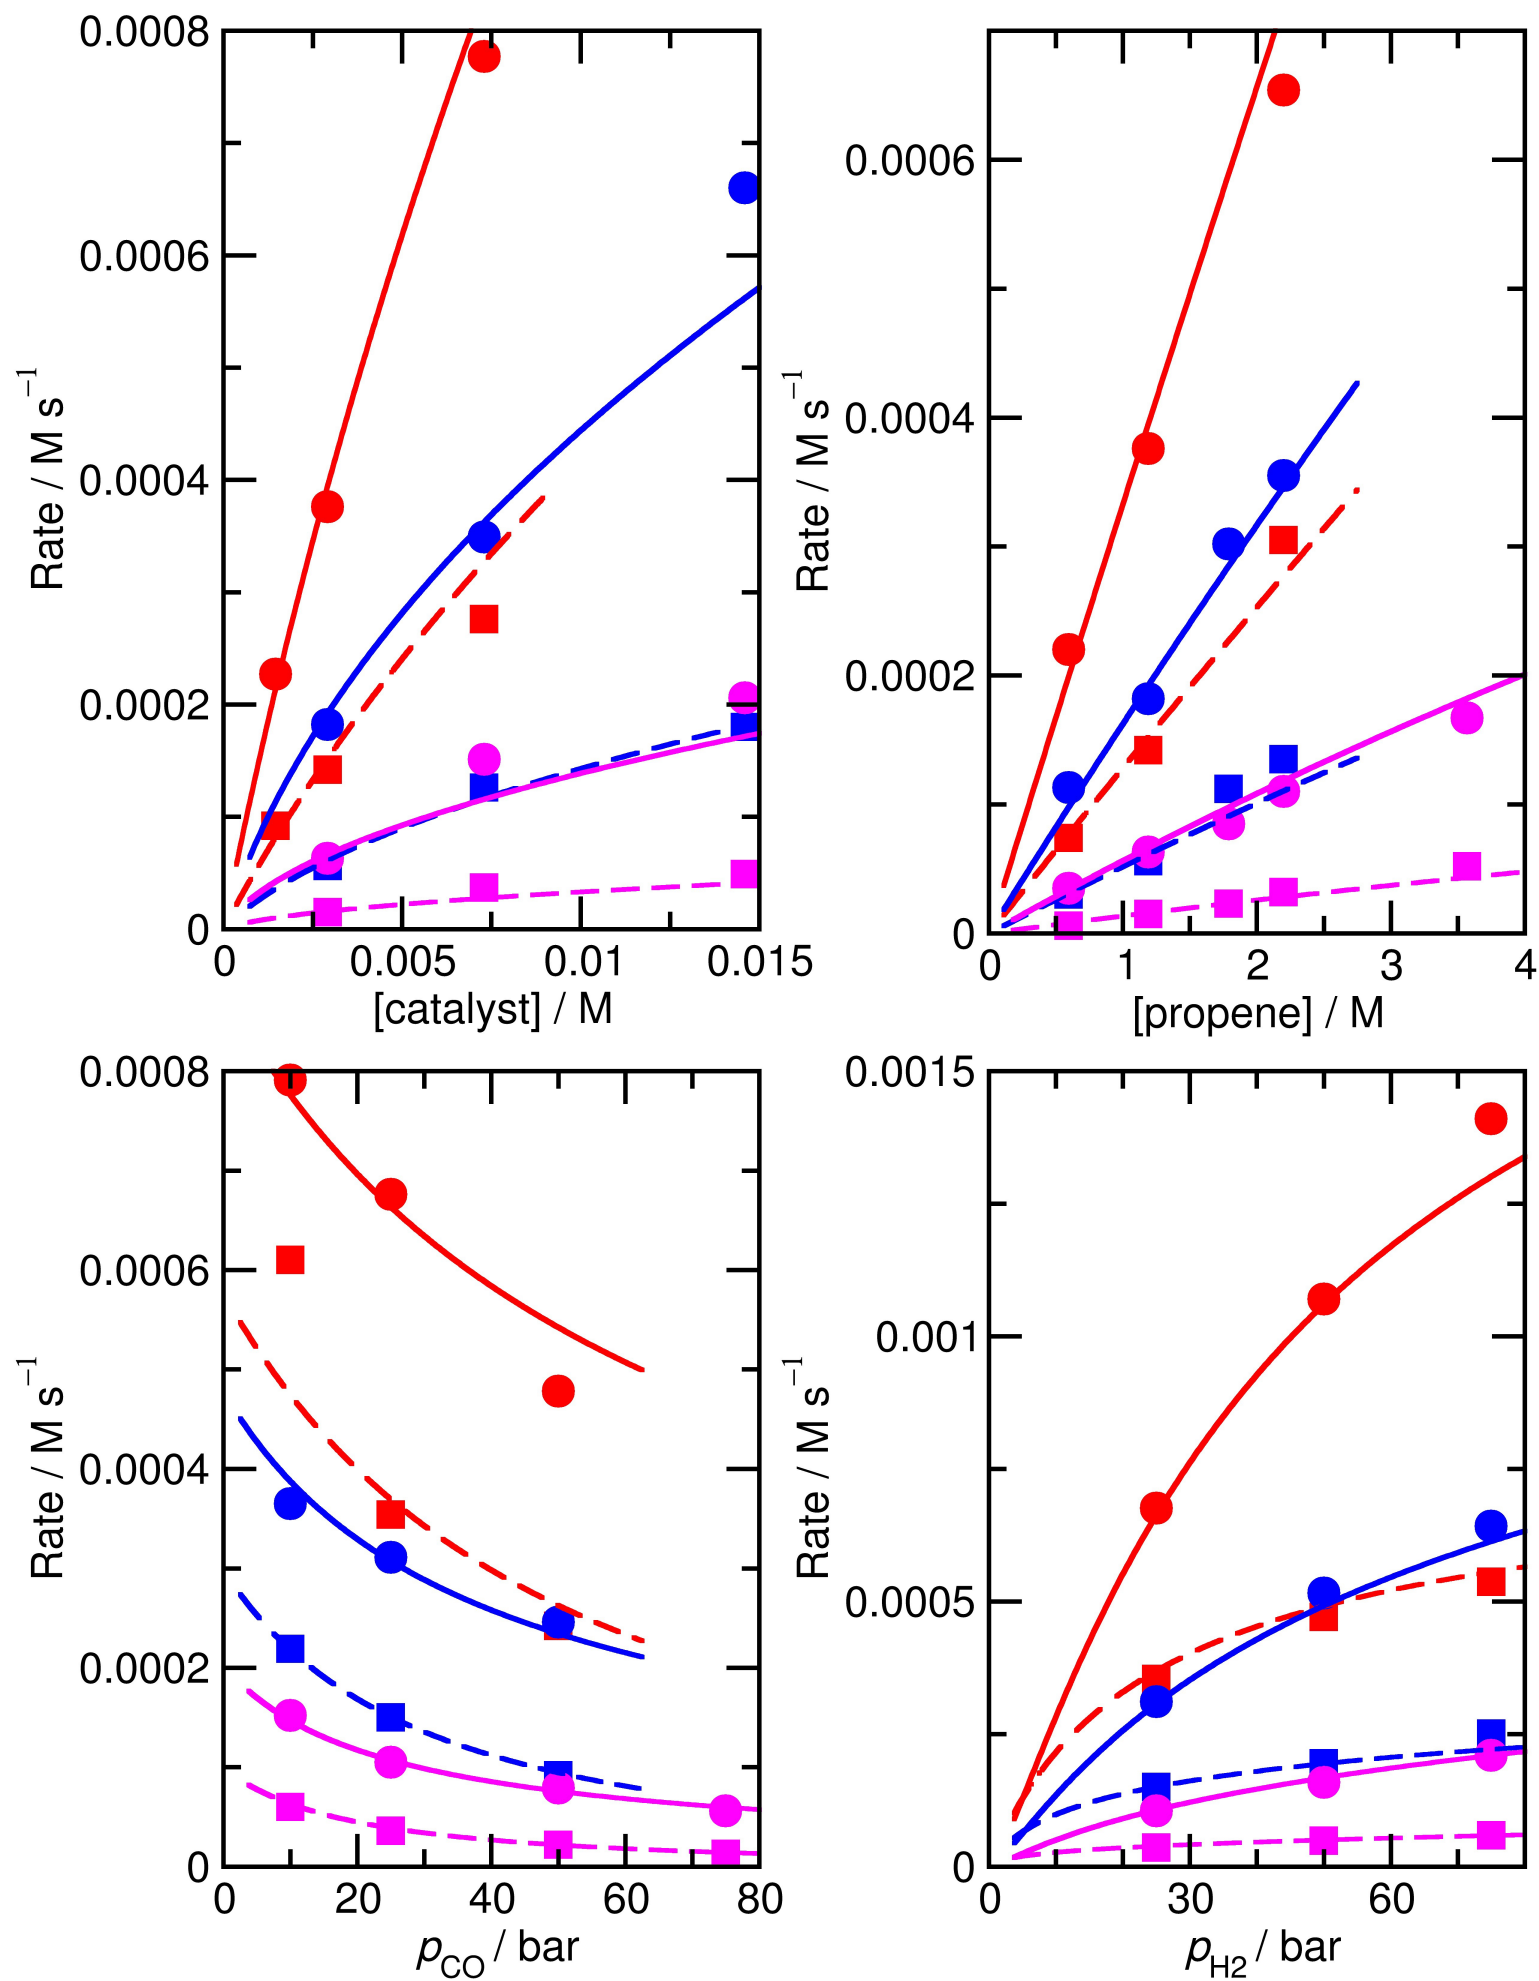

Supplement: d3cy01625k3.pdf [file d3cy01625k3.pdf]

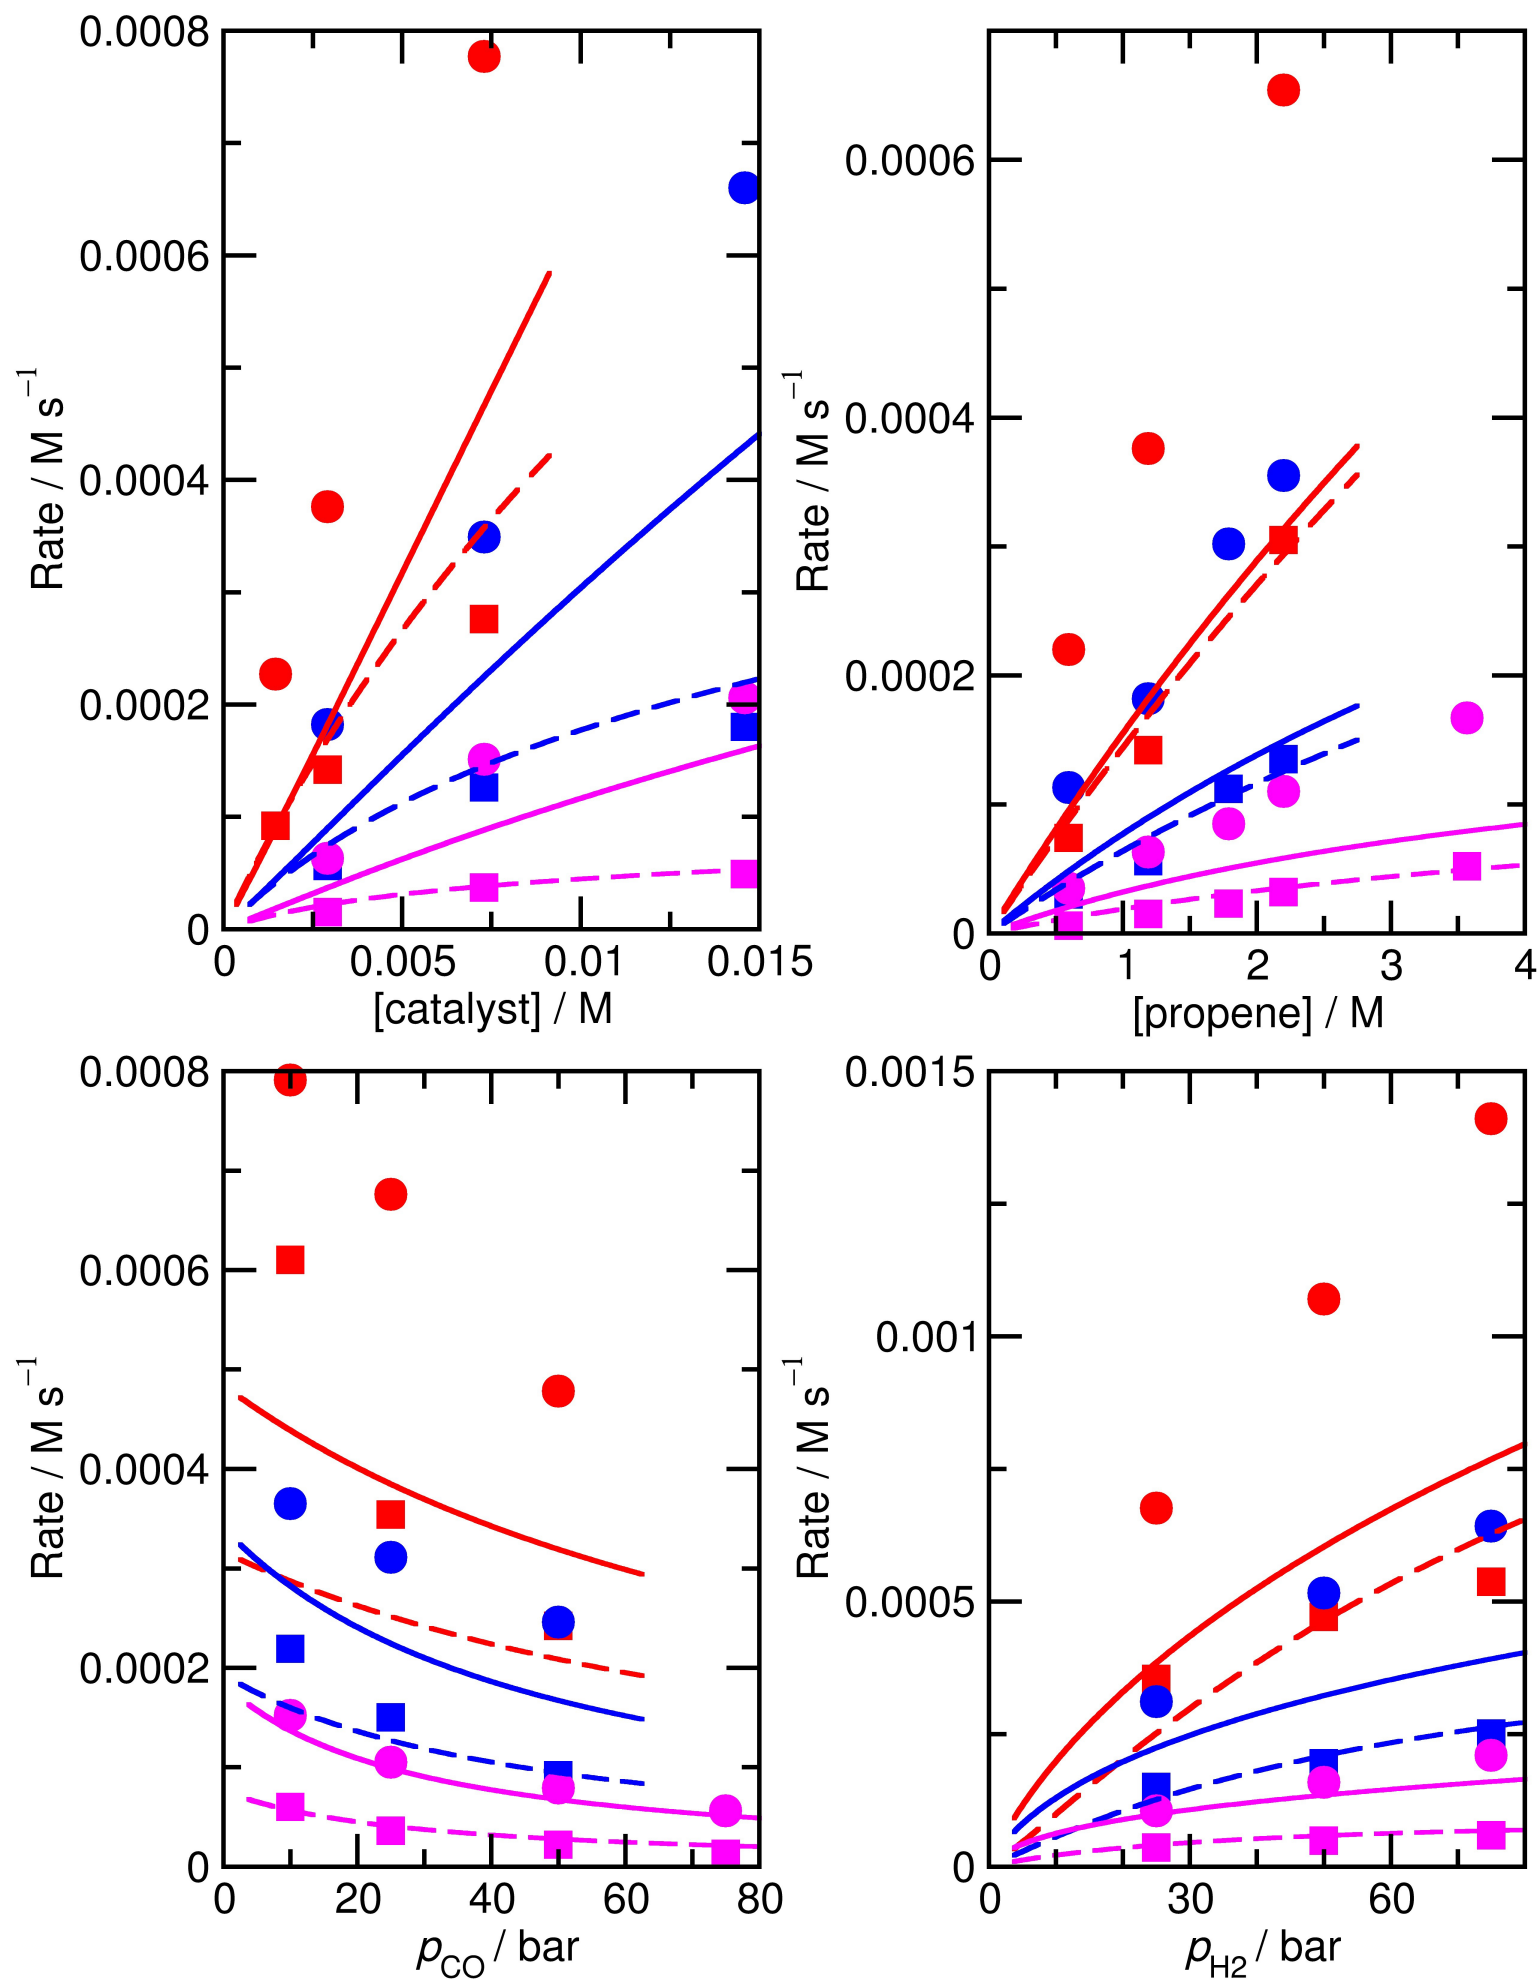

Supplement: d3cy01625k4.pdf [file d3cy01625k4.pdf]

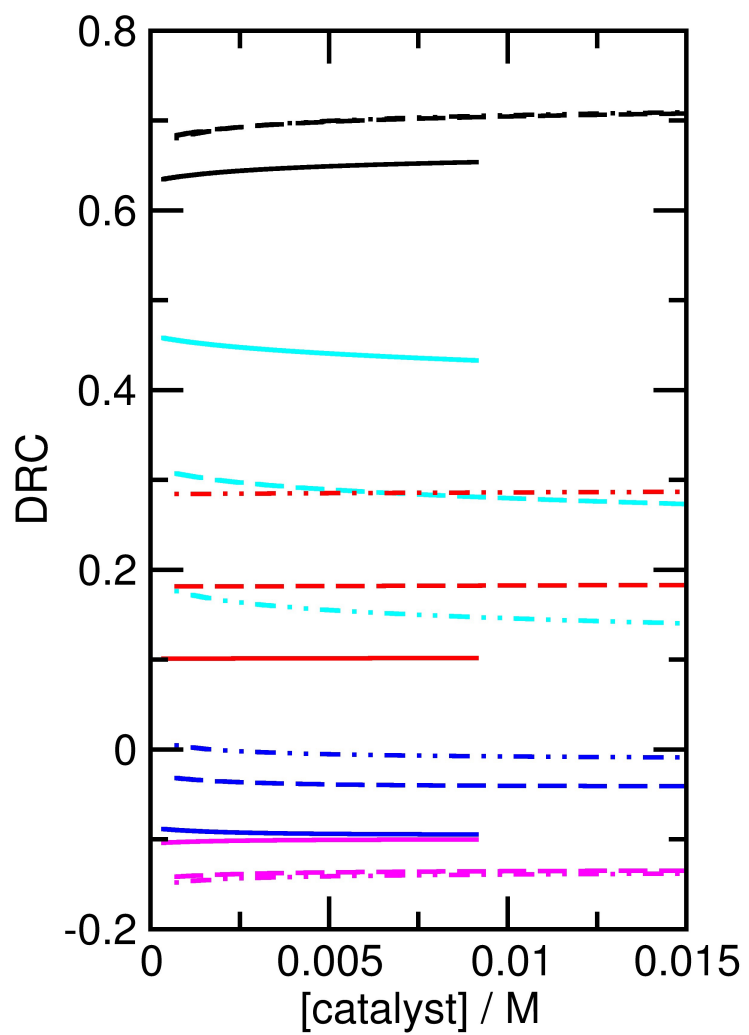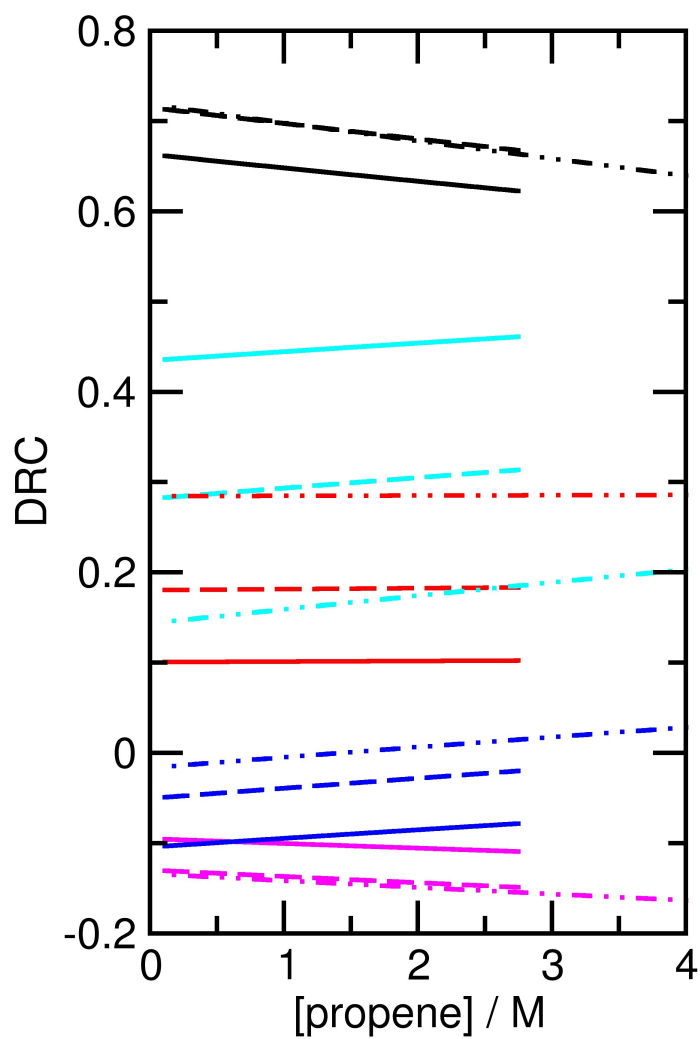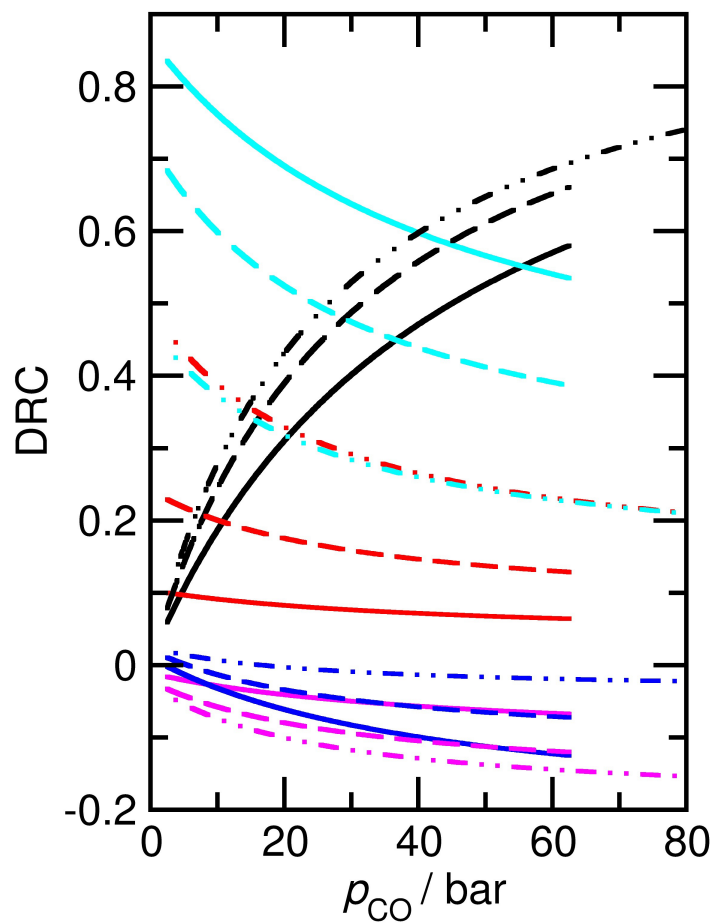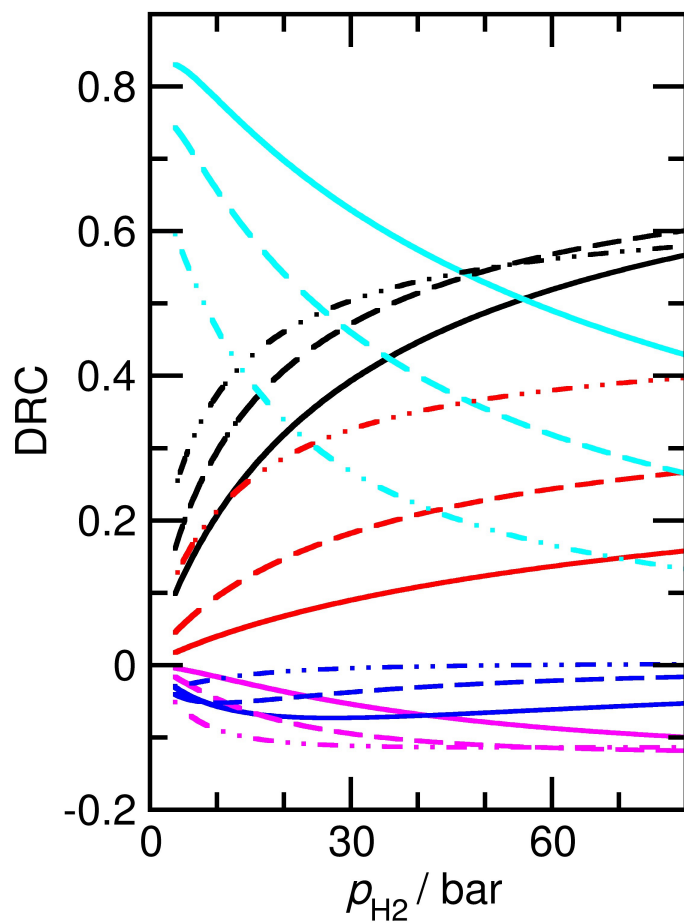

Supplement: d3cy01625k5.pdf [file d3cy01625k5.pdf]

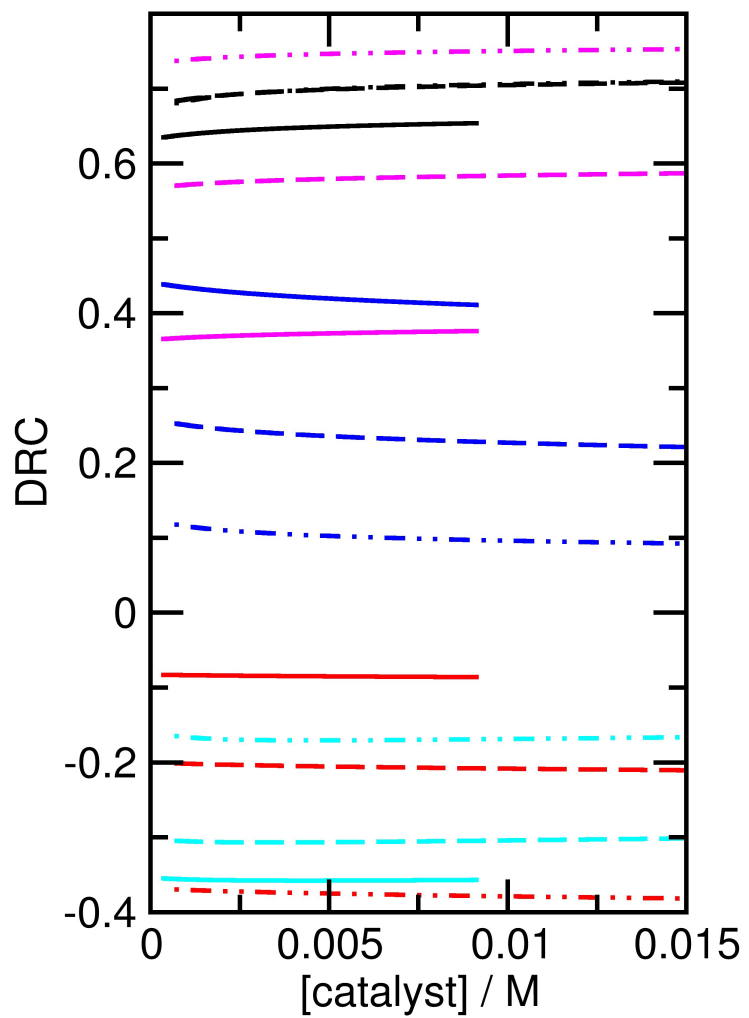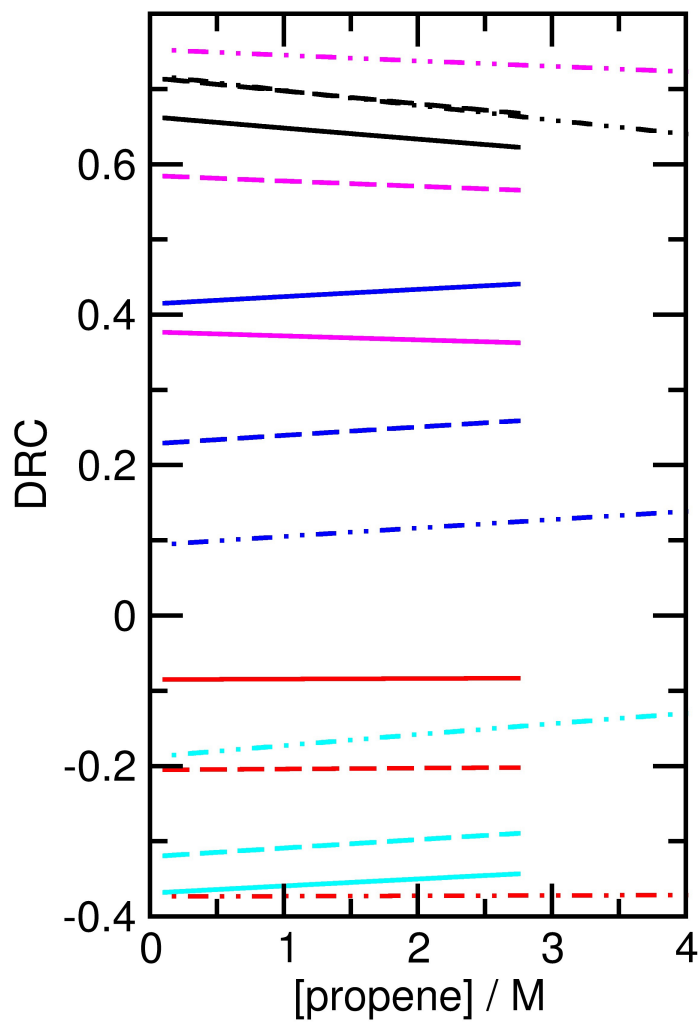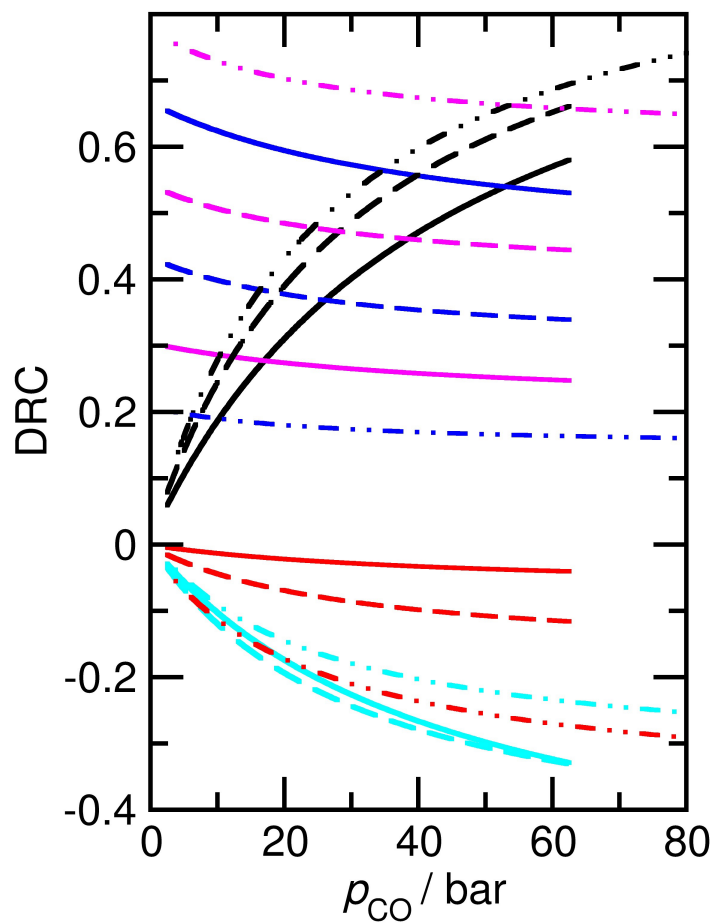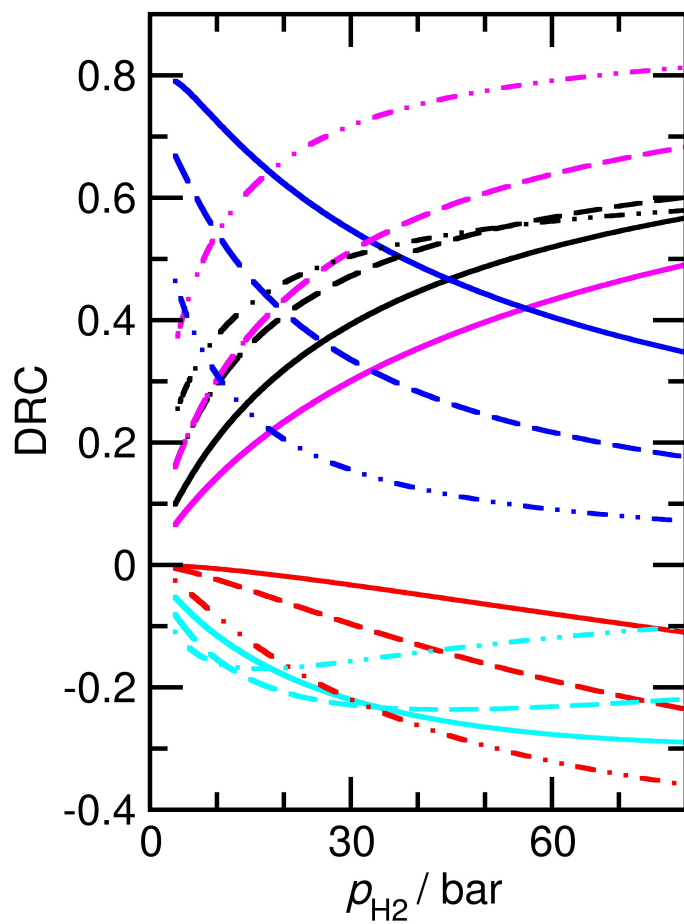

Supplement: d3cy01625k6.pdf [file d3cy01625k6.pdf]

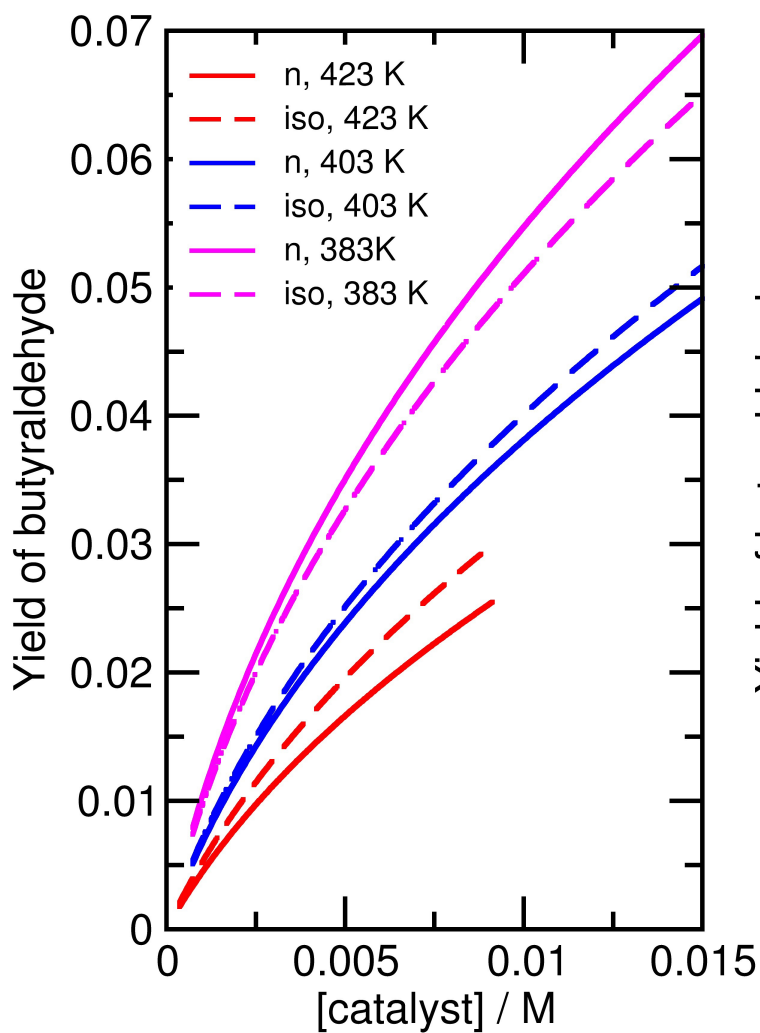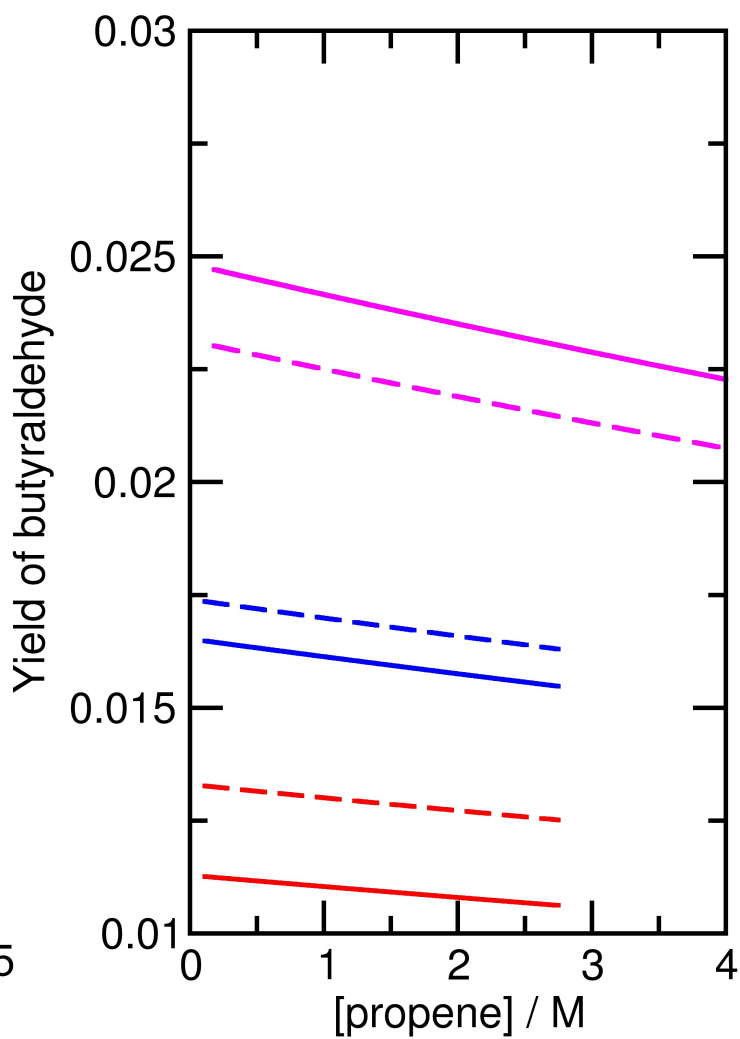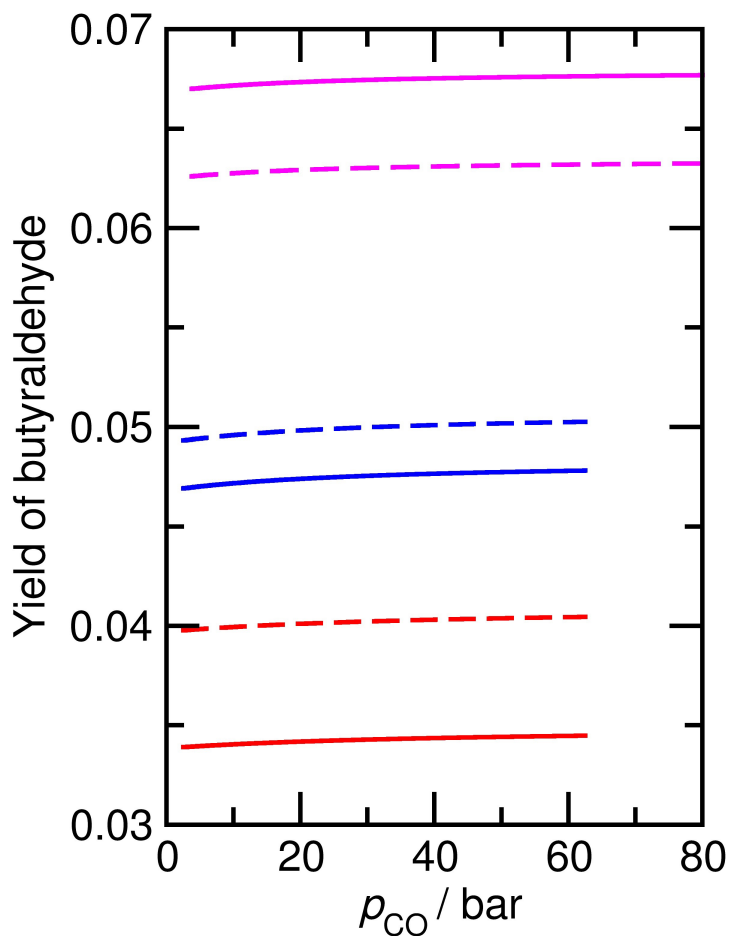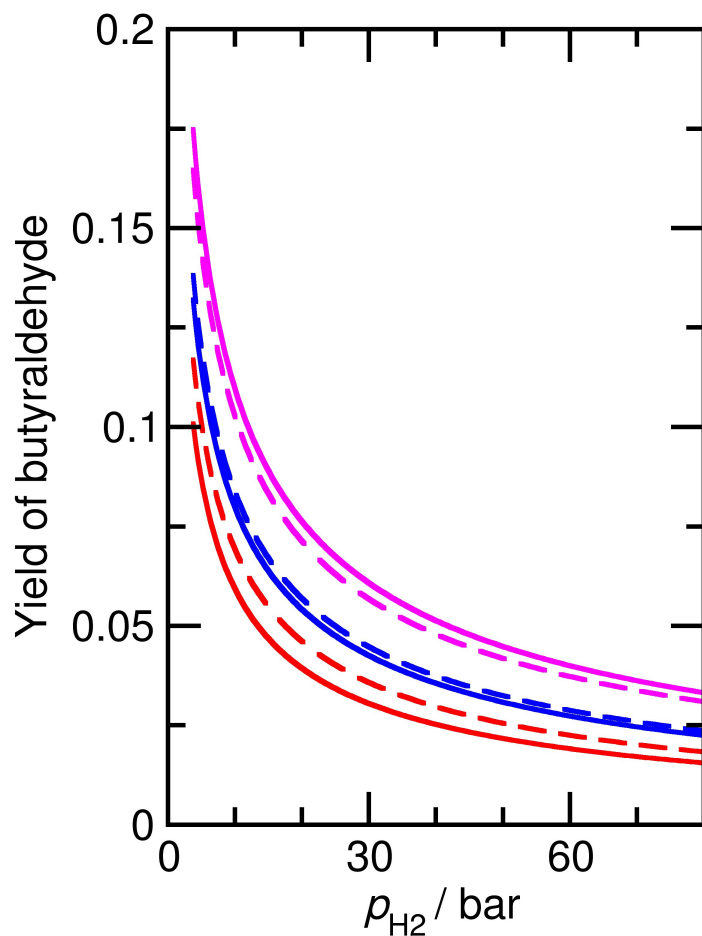

Supplement: d3cy01625k7.pdf [file d3cy01625k7.pdf]

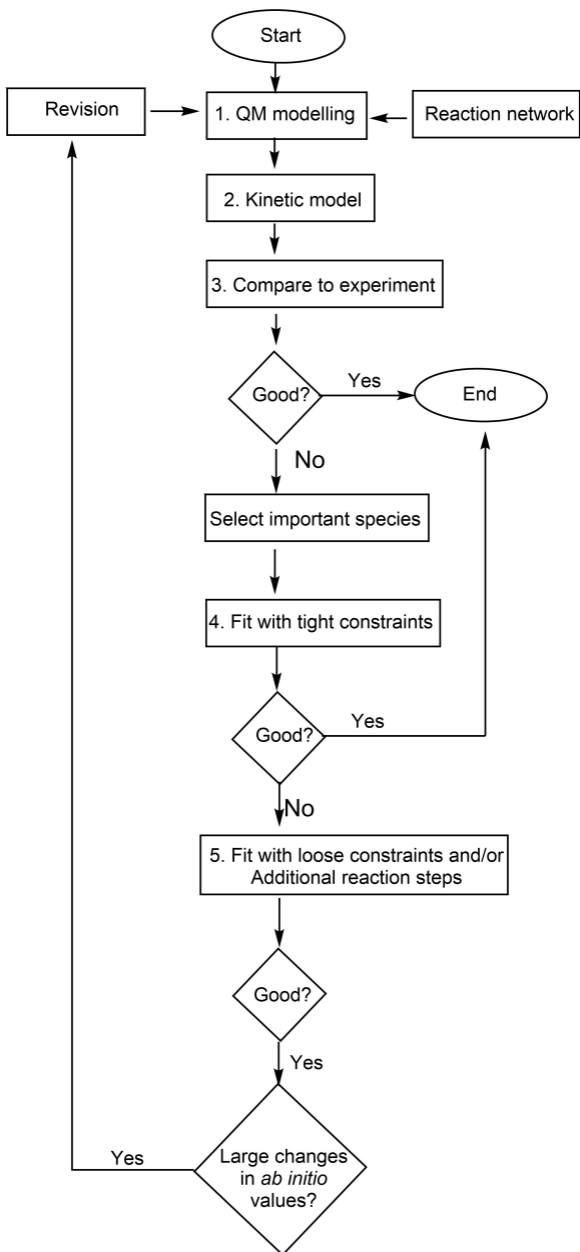

Supplement: d3cy01625k8.pdf [file d3cy01625k8.pdf]
